# Supplementary material for: DNA action on the growth and habit modification of NaCl crystals
Source: Royal Society of Chemistry journal article supplement (doi:10.1039/c7ce01148b), 2017-01-01
Supplement: c7ce01148b1.pdf [file c7ce01148b1.pdf]

## Supplementary Material (ESI)

---

DNA participate in the preparation of hopper like NaCl crystals

Yazhou Qin,<sup>a,c</sup> Dongdong Yu,<sup>b</sup> and Jianguang Zhou<sup>\*a</sup>

### Experimental Section

All reagents and solvents were purchased from commercial sources and used as received without further purification. Chemicals used in this study included NaCl (A.R. 99.5 %, Sinopharm Group Chemical Reagent Co., Ltd., China), AgNO<sub>3</sub> (A.R. 99.8%, Sinopharm Group Chemical Reagent Co., Ltd., China); DNA, (Biotech Bioengineering (Shanghai) Co., Ltd., China); Acetone(A.R. 99.5%, Sinopharm Group Chemical Reagent Co., Ltd., China), Ultrapure water produced with a Milli-Q Integral 5 system was used in all experiments.

The DNA sequences were shown as follows,

DNA-1: 5'-CCCCCCCCCCCCCTTTTTTTTTTTTTTTTTTTTTTTTTTTTTTTTTTTT-3'

DNA-2: 5'-CCCCCTTTTTTTTTTTTTTTTTTTTTTTTTTTTTTTTTTTTTTT-3'

DNA-3: 5'-AAAAAAAAAAAAAAAAAAAAAAAAAAAAAAAAAAAAAAAAAAAA-3'

DNA-4: 5'-AAAAAAAAAAAAAAAAAAAAAAAAAAAA-3'

### Synthesis of NaCl crystal

#### 1. Preparation of DNA solution, NaCl solution and AgNO<sub>3</sub> solution

(1). DNA solution: First of all, DNA dry powder centrifuge 3 min at 10000 rpm, and then use the pipettes add 45  $\mu$ l water into DNA powder, mix with shock, and get 100  $\mu$ M DNA solution.

(2). AgNO<sub>3</sub> solution: First, 0.2550 g AgNO<sub>3</sub> was weighed into the 1 ml centrifuge tube with a balance, 1 ml of water was added to dissolved the AgNO<sub>3</sub>, and then blended to obtain 1.5 M AgNO<sub>3</sub> solution. Then, 10  $\mu$ l of the above AgNO<sub>3</sub> solution was aspirated with a pipette, diluted to 1 ml, and shaken to obtain a 1.5 mM AgNO<sub>3</sub> solution.

(3). NaCl solution: Weighing 0.1740 g NaCl with a balance, dissolved in 3 ml of water mixed evenly to get 3.00 M NaCl solution. And then absorb the above 3.00 M NaCl solution 750  $\mu$ l, 500  $\mu$ l, 250  $\mu$ l, 100  $\mu$ l and 50  $\mu$ l were diluted to 1 ml, mixed even after the concentration of NaCl solution were 2.25 M, 1.50 M, 0.75 M, 0.30 M and 0.15 M.

#### 2. Preparation of NaCl crystals

Take a piece of slides, immersed in the aqua regia 1 hour for cleaning, and then rinse with a lot of water to remove the aqua regia. Moreover wash it twice with ethanol and acetone, then wash it twice with water and dry at room temperature.

##### (1). Preparation conditions of NaCl crystals without AgNO<sub>3</sub>.

25  $\mu$ l of 3.00 M, 2.25 M, 1.50 M, 0.75 M, 0.30 M and 0.15 M NaCl solution were added to 25  $\mu$ l of 100  $\mu$ M DNA-1 solution using a pipett. After storage at room temperature for 1 hour, 10  $\mu$ l of the mixed solution was added to the slide with a pipette and the solvent was gradually evaporated at room temperature to precipitate the NaCl crystals. The same procedure was used for DNA-2.

##### (2). Preparation conditions of NaCl crystals with different DNA with AgNO<sub>3</sub>.

In a typical synthesis, the pipettes were sprayed with 100  $\mu$ M of DNA-1 solution (15  $\mu$ L) into a 200-mer centrifuge tube. Then, 0.15 M NaCl solution was added to the DNA-1 solution, followed by 6  $\mu$ l of AgNO<sub>3</sub> and 6  $\mu$ l of water. Shake mixing, room temperature storage 1 h, and then use the pipette to absorb the mixture 10 $\mu$ l drops on the slide. At room temperature, the solvent gradually evaporates and precipitates crystals. The same procedure was used for without DNA, DNA-3, DNA-4, DNA-1 and DNA-3, DNA-1 and DNA-4, respectively.

##### (3). Characterization of the prepared NaCl crystals.

The prepared NaCl crystals were characterized by optical microscopy, XRD and SEM. The phases of samples were characterized by X-ray diffraction (XRD, Cu K $\alpha$ 1 radiation, Rigaku /Ultima IV, Japan). The morphologies and structures of samples were studied using scanning electron microscopy (SEM, 3.0kV, SU70, Hitachi, Japan).

#### Supplementary Material (ESI)

| No. | $C_{\text{NaCl}}/\text{mol}\cdot\text{L}^{-1}$ | $C_{\text{DNA-1}}/\mu\text{mol}\cdot\text{L}^{-1}$ | $C_{\text{Ag}^+}/\mu\text{mol}\cdot\text{L}^{-1}$ |
|-----|------------------------------------------------|----------------------------------------------------|---------------------------------------------------|
| 1   | 0.15                                           | 100                                                | 0                                                 |
| 2   | 0.30                                           | 100                                                | 0                                                 |
| 3   | 0.75                                           | 100                                                | 0                                                 |
| 4   | 1.50                                           | 100                                                | 0                                                 |
| 5   | 2.25                                           | 100                                                | 0                                                 |
| 6   | 3.00                                           | 100                                                | 0                                                 |

Table 1 Preparation conditions of NaCl crystals.  $V_{\text{NaCl}}=V_{\text{DNA}}=25\ \mu\text{l}$

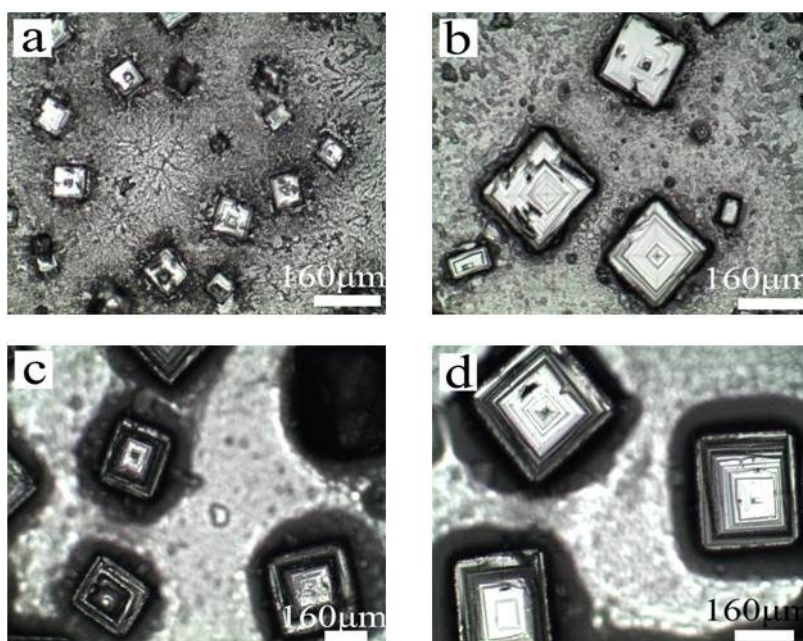

Figure S1. Optical Micrographs of hopper-like NaCl Crystals prepared by DNA-2. The concentration of DNA-2 was 100 mM, while the concentration of NaCl was 0.15 M (a), 0.75 M (b), 1.50 M (c), and 2.25 M (d).  $V_{\text{NaCl}}=V_{\text{DNA}}=25\ \mu\text{l}$

| No. | $V_{\text{NaCl}}/\mu\text{l}$ | $V_{\text{DNA}}/\mu\text{l}$ | $V_{\text{AgNO}_3}/\mu\text{l}$ | $V_{\text{H}_2\text{O}}/\mu\text{l}$ |
|-----|-------------------------------|------------------------------|---------------------------------|--------------------------------------|
| 1   | 73                            | 0                            | 0                               | 27                                   |
| 2   | 73                            | 15 DNA-1                     | 6                               | 6                                    |
| 3   | 73                            | 15 DNA-3                     | 6                               | 6                                    |
| 4   | 73                            | 15 (DNA-1 and DNA-3)         | 6                               | 6                                    |
| 5   | 73                            | 15 (DNA-1 and DNA-4)         | 6                               | 6                                    |

Table 2 Preparation conditions of NaCl crystals with different DNA.

$$C_{\text{NaCl}}=0.15\ \text{mol}\cdot\text{L}^{-1}, C_{\text{DNA}}=100\ \mu\text{mol}\cdot\text{L}^{-1}, C_{\text{AgNO}_3}=1.5\ \text{mmol}\cdot\text{L}^{-1}$$

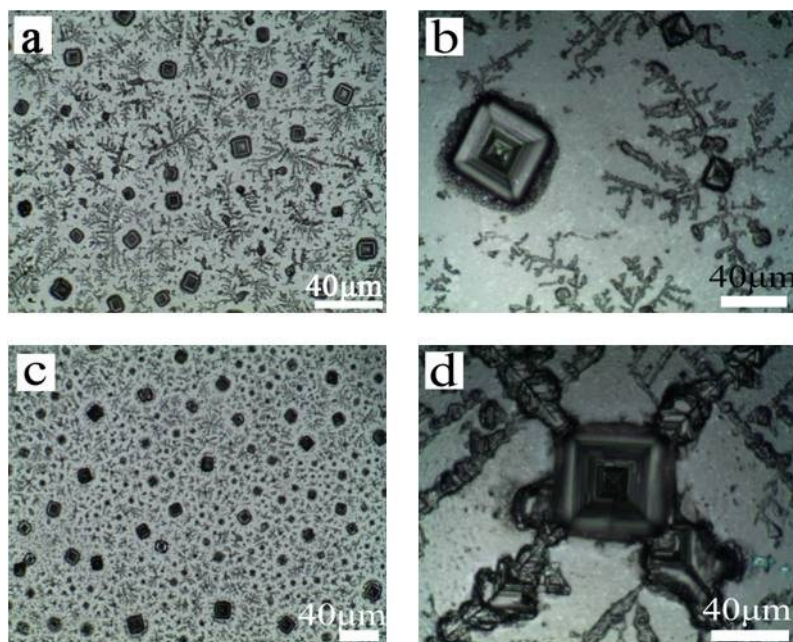

Figure S2. Optical Microscopes of Dendritic NaCl Crystals (a, b) prepared by  $100 \mu\text{mol}\cdot\text{L}^{-1}$  DNA-1, DNA-3,  $0.15 \text{ mol}\cdot\text{L}^{-1}$  NaCl and  $1.5 \text{ mmol}\cdot\text{L}^{-1}$  silver nitrate, (c, d) is prepared by  $100 \mu\text{mol}\cdot\text{L}^{-1}$  DNA-1, DNA-4,  $0.15 \text{ mol}\cdot\text{L}^{-1}$  NaCl and  $1.5 \text{ mmol}\cdot\text{L}^{-1}$  silver nitrate.

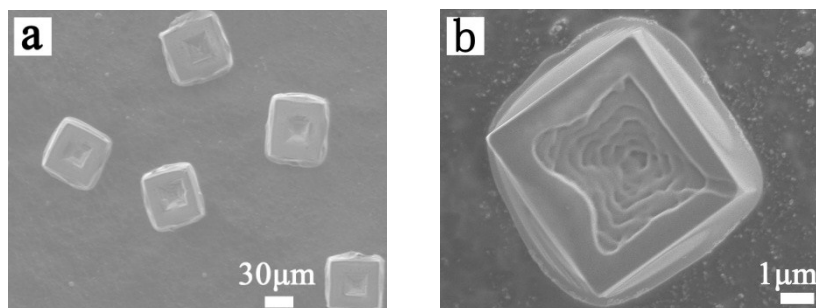

Figure S3. SEM images of irregular hopper-like NaCl crystals prepared by  $50 \mu\text{mol}\cdot\text{L}^{-1}$  DNA-2,  $75 \text{ mmol}\cdot\text{L}^{-1}$  NaCl and  $90 \text{ mmol}\cdot\text{L}^{-1}$  silver nitrate. (a) low magnification image, (b) high magnification image.
